# Supplementary material
Source: publisher figshare collection journal article supplement (https://gsajournals.figshare.com/ndownloader/files/27743265)
Supplement: Supplementary file 1 [file 27743265]

| **Table S4.** BUSCO assessment result. | |  |
| --- | --- | --- |
|  | actinopterygii (n: 4,584) | vertebrata (n: 2,586) |
| Complete BUSCOs | 4,290 (93.6%) | 2,465 (95.3%) |
| Complete and single-copy BUSCOs | 3,911 (85.3%) | 2,277 (88.1%) |
| Complete and duplicated BUSCOs | 379 (8.3%) | 188 (7.3%) |
| Fragmented BUSCOs | 84 (1.8%) | 39 (1.5%) |
| Missing BUSCOs | 210 (4.5%) | 82 (3.2%) |
